# Supplementary material for: A Large Pseudoautosomal Region on the Sex Chromosomes of the Frog Silurana tropicalis
Source: PubMed Central journal article supplement — Genome Biol Evol. 2013 May 9;5(6):1087–98. doi: 10.1093/gbe/evt073 (PMC3698919; doi:10.1093/gbe/evt073), 2013-05-09

Supplementary Figure 1. Nucleotide diversity ( $\pi$ ) in 500,000 bp windows is similar in three males (blue) and two females (red) that had an identical mtDNA genotype that differed from the golden strain genotype by one nucleotide substitution. Labeling follows Figure 3.

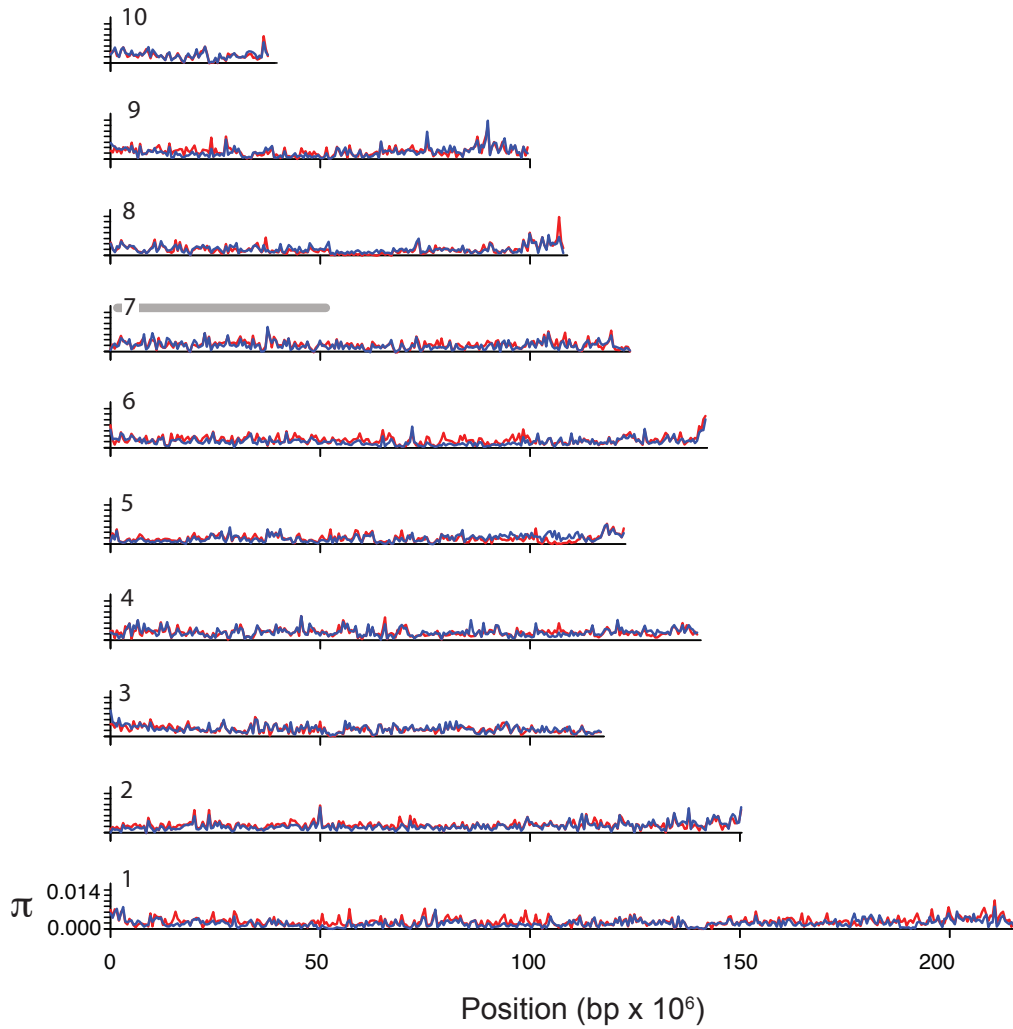

Supplement: supp_evt073_SI1.pdf [file supp_evt073_SI1.pdf]
